# Supplementary material
Source: PubMed Central journal article supplement (PMC6925351)
Supplement: NIHMS1539817-supplement-1.pdf [file NIHMS1539817-supplement-1.pdf]

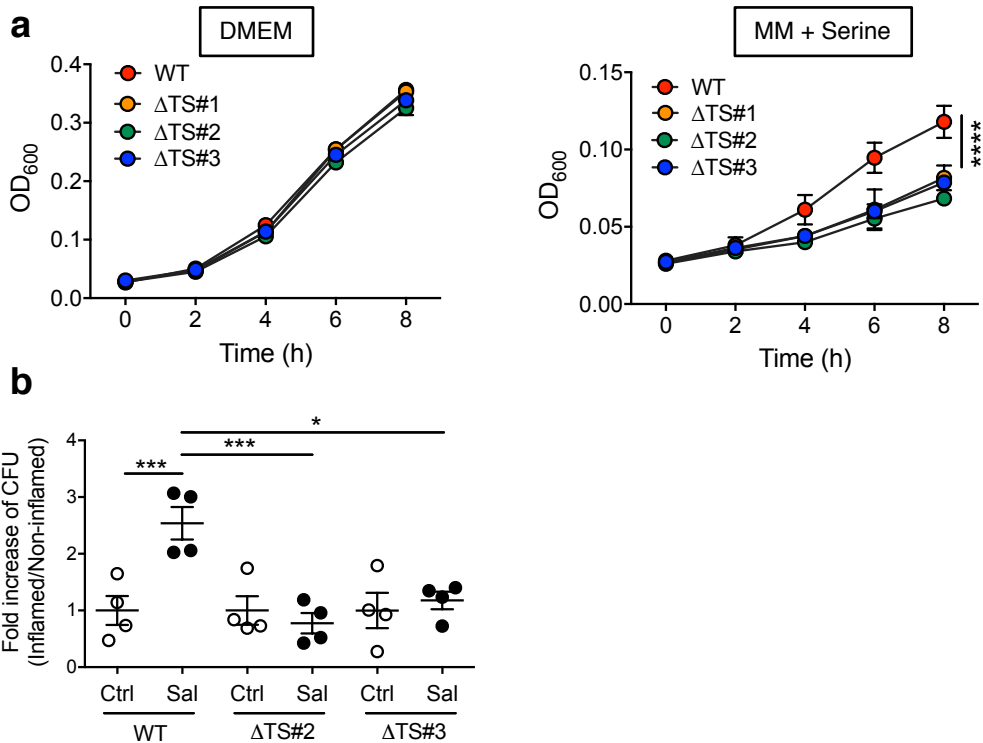

**Supplementary figure 1. L-serine catabolism mutants show serine-dependent growth defect and impaired fitness in the inflamed gut.**

(a) AIEC LF82 WT and  $\Delta tdc\Delta sda$  ( $\Delta$ TS) mutant strain #1 (used in the main Figure and Extended Data Figures) and additional  $\Delta$ TS double mutant strains #2 and #3 (generated in a clean background for validation) were cultured in DMEM (0.45% glucose) or a minimal medium (0.1% glucose) supplemented with 1 mM serine for 8 hours at 37°C with 20% O<sub>2</sub> and 5% CO<sub>2</sub>. Growth kinetics (O.D<sub>600</sub>) are shown. Data represent geometric mean  $\pm$  s.d. (N=3, biological replicates). \*\*\*\*;  $P < 0.0001$  by 2-Way ANOVA. (b) AIEC LF82 WT and  $\Delta$ TS mutants #2 and #3 ( $1 \times 10^3$  CFU) were inoculated into sterilized cecal content isolated from healthy and colitic (*Salmonella*-induced colitis) and cultured for 8 hrs at 37°C with 20% O<sub>2</sub> and 5% CO<sub>2</sub>. After 8hrs, culture media were plated onto LB agar and bacterial CFUs were measured. Fold increase of bacterial strains in the inflammation (+) (Sal) luminal content to the inflammation (-) control condition (Ctrl) is shown. Data represent mean  $\pm$  s.d. (N=3, biological replicates). N.S.; not significant, \*;  $P < 0.05$ , \*\*\*;  $P < 0.001$  by Mann-Whitney *U* test (two-sided).

**Table S3. Bacteria strains and plasmids used in this study.**

| Bacteria                                       | Description                                                                                                                                                   | Reference or Source |
|------------------------------------------------|---------------------------------------------------------------------------------------------------------------------------------------------------------------|---------------------|
| MG1655                                         | Human commensal <i>E. coli</i> ( <i>Str<sup>R</sup></i> )                                                                                                     | 25                  |
| MG1655 $\Delta$ <i>tdc</i> $\Delta$ <i>sda</i> | MG1655 $\Delta$ <i>tdc</i> ABCDEF and $\Delta$ <i>sda</i> BC ( <i>Amp<sup>R</sup></i> , <i>Kan<sup>R</sup></i> , <i>Cam<sup>R</sup></i> )                     | This study          |
| HS                                             | Human commensal <i>E. coli</i> isolate (O9:H4); Carb                                                                                                          | 24                  |
| LF82                                           | Human adherent-invasive <i>E. coli</i> isolate (O83:H1), <i>Amp<sup>R</sup></i>                                                                               | 6                   |
| LF82 $\Delta$ <i>tdc</i>                       | LF82 $\Delta$ <i>tdc</i> ABCDEF ( <i>Amp<sup>R</sup></i> , <i>Kan<sup>R</sup></i> )                                                                           | This study          |
| LF82 $\Delta$ <i>sda</i>                       | LF82 $\Delta$ <i>sda</i> BC ( <i>Amp<sup>R</sup></i> , <i>Cam<sup>R</sup></i> )                                                                               | This study          |
| LF82 $\Delta$ <i>tdc</i> $\Delta$ <i>sda</i>   | LF82 $\Delta$ <i>tdc</i> ABCDEF and $\Delta$ <i>sda</i> BC ( <i>Amp<sup>R</sup></i> , <i>Kan<sup>R</sup></i> , <i>Cam<sup>R</sup></i> )                       | This study          |
| EcN                                            | Human probiotic <i>E. coli</i> Nissle 1917, wild-type                                                                                                         | Ardeypharm, Germany |
| CUMT8                                          | Mouse adherent-invasive <i>E. coli</i> isolate                                                                                                                | 23                  |
| CUMT8 <i>Str<sup>R</sup></i>                   | Mouse adherent-invasive <i>E. coli</i> isolate ( <i>Str<sup>R</sup></i> )                                                                                     | This study          |
| <i>E. coli</i> SK460                           | Mouse commensal <i>E. coli</i> isolated from healthy gut                                                                                                      | This study          |
| <i>E. coli</i> dn15.6244.1                     | Mouse commensal <i>E. coli</i>                                                                                                                                | 26                  |
| <i>Citrobacter rodentium</i> (DBS100)          | Murine model of human EPEC or EHEC ( <i>NaI<sup>R</sup></i> )                                                                                                 | 46                  |
| DBS100 $\Delta$ <i>tdc</i> $\Delta$ <i>sda</i> | <i>C. rodentium</i> DBS100 $\Delta$ <i>tdc</i> ABCDEF and $\Delta$ <i>sda</i> BC ( <i>NaI<sup>R</sup></i> , <i>Kan<sup>R</sup></i> , <i>Cam<sup>R</sup></i> ) | This study          |
| DH5 $\alpha$                                   | <i>E. coli</i> used for plasmid amplification                                                                                                                 | Invitrogen          |

| Plasmid | Description                                                     | Reference or Source |
|---------|-----------------------------------------------------------------|---------------------|
| pKD46   | Lambda Red recombinase expression plasmid                       | 39                  |
| pKD3    | Template plasmid for gene disruption ( <i>Cam<sup>R</sup></i> ) | 39                  |
| pKD4    | Template plasmid for gene disruption ( <i>Kan<sup>R</sup></i> ) | 39                  |

**Table S4. Primers used in this study.**

| 1. Primers for mutant construction     |                                                                             |            |
|----------------------------------------|-----------------------------------------------------------------------------|------------|
| Name                                   | Sequence                                                                    | Reference  |
| tdcA_H1_F                              | TCATTTTGATACACTTCATACCGTCAATGAGGTAATTAACGTAGG<br>TCGTTGTGTAGGCTGGAGCTGCTTC  | This study |
| tdcG_H2_R                              | AAAAAAGGGTGCACATTTTGTGCACCCAAGAATGATAGCTGACA<br>GCAATGATGGGAATTAGCCATGGTCC  | This study |
| sdaC_H1_F                              | ATTAAGCCATCGCCGATAGACAGATTTTCATTTTTACGGTCAGGC<br>ACCTTCGTGTAGGCTGGAGCTGCTTC | This study |
| sdaB_H2_R                              | ATTCGATGCCAGAACAGGCTATGGCTGGATGAGAAATCGGGAA<br>GAGGCCTATGGGAATTAGCCATGGTCC  | This study |
| Screening_tdcA_F                       | CGATGCCATGGAAAGTATTG                                                        | This study |
| Screening_tdcG_R                       | CTCTATTTGCGGCAGATCAC                                                        | This study |
| Screening_sdaC_F                       | CTGATAGATACATAACTTGTGTGTATC                                                 | This study |
| Screening_sdaB_R                       | GCAAATGAACAGCCACGATAAC                                                      | This study |
| 2. Primers for quantitative PCR        |                                                                             |            |
| Name                                   | Sequence                                                                    | Reference  |
| tdcA_F                                 | CCTGCCGGTCAATTGTTACTC                                                       | This study |
| tdcA_R                                 | CCACCGCCTCAGAAGACATAC                                                       | This study |
| rrsB_F                                 | TGTCGTCAGCTCGTGTGTG                                                         | This study |
| rrsB_R                                 | ATCCCCACCTTCCTCCAGTT                                                        | This study |
| 3. Primers for bacteria quantification |                                                                             |            |
| Name                                   | Sequence                                                                    | Reference  |
| <i>Enterobacteriaceae</i> _F           | GTGCCAGCMGCCGCGGTAA                                                         | 3          |
| <i>Enterobacteriaceae</i> _R           | GCCTCAAGGGCACAACCTCCAAG                                                     | 3          |
| Eubacteria 16S_F                       | ACTCCTACGGGAGGCAGCAGT                                                       | 3          |
| Eubacteria 16S_R                       | ATTACCGCGGCTGCTGGC                                                          | 3          |
